# Supplementary material for: Impact of Angiotensin I-converting Enzyme Inhibitors and Angiotensin II Type-1 Receptor Blockers on Survival of Patients with NSCLC
Source: PubMed Central journal article supplement (PMC4756359; doi:10.1038/srep21359), 2016-02-17
Supplement: srep21359-s1.pdf [file srep21359-s1.pdf]

# **Impact of Angiotensin I-converting Enzyme Inhibitors and Angiotensin II Type-1 Receptor Blockers on Survival of Patients with NSCLC**

Lili Miao<sup>1,2,\*</sup>, Wei Chen<sup>1,\*</sup>, Ling Zhou<sup>1</sup>, Huanying Wan<sup>1</sup>, Beili Gao<sup>1</sup>, Yun Feng<sup>1</sup>

<sup>1</sup>Department of Respiration, Ruijin Hospital, School of Medicine, Shanghai Jiao Tong University, Shanghai, China; <sup>2</sup>Department of Respiration, YiZheng People's Hospital, Jiangsu, China.

Supplementary table 1 EGFR-TKI patients' characteristics

| NUMBER | GENDER | AGE (Y) | HISTOLOGY               | STAGE | OS (M) | TKI/PFS (M) | TARGETED DRUG | ACEI /ARB |
|--------|--------|---------|-------------------------|-------|--------|-------------|---------------|-----------|
| 1      | F      | 66      | Adenocarcinoma          | IV    | 35.2   | 14.5        | Icotinib      | Y         |
| 2      | M      | 87      | Adenocarcinoma          | IIIB  | 35.8   | 6.8         | Gefitinib     |           |
| 3      | M      | 78      | Squamous cellcarcinoma  | IV    | 15.1   | 5.2         | Icotinib      |           |
| 4      | M      | 70      | Adenocarcinoma          | IV    | 6      | 4.8         | Erlotinib     |           |
| 5      | M      | 57      | Adenocarcinoma          | IV    | 12.9   | 8.5         | Erlotinib     |           |
| 6      | M      | 66      | Adenocarcinoma          | IV    | 18.2   | 7.2         | Erlotinib     | Y         |
| 7      | M      | 66      | Squamous cellcarcinoma  | IV    | 10.2   | 2.1         | Icotinib      |           |
| 8      | F      | 65      | Adenocarcinoma          | IV    | 10.8   | 7.7         | Erlotinib     |           |
| 9      | F      | 58      | Adenocarcinoma          | IV    | 19.2   | 9           | Icotinib      |           |
| 10     | M      | 73      | Squamous cellcarcinoma  | IV    | 10.2   | 7.9         | Erlotinib     |           |
| 11     | F      | 79      | Adenocarcinoma          | IV    | 5.2    | 4.6         | Icotinib      |           |
| 12     | M      | 73      | Adenocarcinoma          | IIIB  | 8.1    | 6.2         | Gefitinib     |           |
| 13     | F      | 72      | Adenocarcinoma          | IIIA  | 20.8   | 11.1        | Erlotinib     |           |
| 14     | F      | 73      | Adenocarcinoma          | IIIA  | 7.9    | 5.9         | Erlotinib     |           |
| 15     | M      | 66      | Adenocarcinoma          | IV    | 10.8   | 4.9         | Erlotinib     |           |
| 16     | F      | 71      | Adenocarcinoma          | IV    | 5.8    | 5.2         | Gefitinib     |           |
| 17     | F      | 69      | Adenocarcinoma          | IIIA  | 27.2   | 21.7        | Gefitinib     |           |
| 18     | F      | 73      | Adenocarcinoma          | IV    | 6      | 5.8         | Gefitinib     |           |
| 19     | M      | 67      | Adenocarcinoma          | IV    | 7.8    | 6.2         | Gefitinib     |           |
| 20     | M      | 53      | Squamous adenocarcinoma | IV    | 8.2    | 7.8         | Erlotinib     |           |
| 21     | M      | 65      | Adenocarcinoma          | IIIA  | 41.8   | 15.6        | Erlotinib     | Y         |

|    |   |    |                          |      |      |      |           |   |
|----|---|----|--------------------------|------|------|------|-----------|---|
| 22 | M | 71 | Non-small cell carcinoma | IIIA | 24.1 | 9.5  | Erlotinib | Y |
| 23 | M | 70 | Adenocarcinoma           | IIIA | 35.8 | 19.1 | Erlotinib | Y |
| 24 | M | 66 | Adenocarcinoma           | IIIA | 24.9 | 14.4 | Erlotinib | Y |
| 25 | M | 66 | Adenocarcinoma           | IV   | 48.2 | 11.9 | Gefitinib |   |
| 26 | M | 69 | Adenocarcinoma           | IIIA | 47.7 | 11.9 | Gefitinib |   |
| 27 | F | 76 | Adenocarcinoma           | IIA  | 88   | 17.8 | Gefitinib |   |
| 28 | M | 67 | Adenocarcinoma           | IV   | 18.2 | 9.8  | Gefitinib |   |
| 29 | F | 70 | Adenocarcinoma           | IV   | 62   | 16.2 | Gefitinib |   |
| 30 | F | 68 | Adenocarcinoma           | IV   | 9.8  | 8.2  | Erlotinib |   |
| 31 | F | 66 | Adenocarcinoma           | IV   | 40.4 | 22.3 | Gefitinib | Y |
| 32 | F | 66 | Adenocarcinoma           | IV   | 16.2 | 6.1  | Erlotinib |   |
| 33 | F | 69 | Squamous adenocarcinoma  | IV   | 9.2  | 4.5  | Icotinib  |   |
| 34 | F | 67 | Squamous adenocarcinoma  | IV   | 16.8 | 4.2  | Erlotinib |   |
| 35 | F | 68 | Adenocarcinoma           | IV   | 3    | 4.1  | Gefitinib |   |
| 36 | F | 78 | Adenocarcinoma           | IV   | 27.8 | 11.2 | Icotinib  |   |
| 37 | F | 68 | Squamous adenocarcinoma  | IV   | 31   | 6.8  | Icotinib  |   |
| 38 | M | 66 | Squamous adenocarcinoma  | IV   | 26.2 | 12.4 | Erlotinib | Y |
| 39 | M | 71 | Adenocarcinoma           | IV   | 6.2  | 3.7  | Erlotinib |   |
| 40 | M | 76 | Adenosquamous carcinoma  | IV   | 48   | 5.2  | Gefitinib |   |
| 41 | M | 69 | Adenocarcinoma           | IV   | 6.8  | 6.2  | Erlotinib |   |
| 42 | M | 77 | Adenocarcinoma           | IV   | 17.2 | 14.5 | Gefitinib | Y |
| 43 | F | 73 | Adenocarcinoma           | IV   | 19.8 | 11.6 | Gefitinib |   |
| 44 | F | 28 | Non-small cell carcinoma | IV   | 40.8 | 6.2  | Gefitinib |   |

|    |   |    |                          |      |      |      |           |   |
|----|---|----|--------------------------|------|------|------|-----------|---|
| 45 | F | 68 | Adenocarcinoma           | IV   | 18.8 | 7.2  | Erlotinib |   |
| 46 | M | 79 | Adenocarcinoma           | IV   | 36.2 | 6    | Gefitinib |   |
| 47 | F | 71 | Adenocarcinoma           | IV   | 8.9  | 4.9  | Gefitinib |   |
| 48 | M | 79 | Neuroendocrine carcinoma | IV   | 5.1  | 4.1  | Erlotinib |   |
| 49 | F | 72 | Adenocarcinoma           | IV   | 30.2 | 8.9  | Gefitinib |   |
| 50 | M | 66 | Squamous cellcarcinoma   | IV   | 5.9  | 3.9  | Icotinib  |   |
| 51 | M | 67 | Adenocarcinoma           | IV   | 42.3 | 15.2 | Gefitinib |   |
| 52 | M | 68 | Adenocarcinoma           | IV   | 49.7 | 14.3 | Gefitinib |   |
| 53 | F | 76 | Adenocarcinoma           | IV   | 11.1 | 10.8 | Gefitinib |   |
| 54 | F | 81 | Adenocarcinoma           | IV   | 23.8 | 12.2 | Icotinib  |   |
| 55 | F | 69 | Adenocarcinoma           | IV   | 13.7 | 6.8  | Gefitinib |   |
| 56 | M | 70 | Adenocarcinoma           | IV   | 11.3 | 5.1  | Erlotinib |   |
| 57 | M | 69 | Adenocarcinoma           | IV   | 36.3 | 7.1  | Gefitinib | Y |
| 58 | F | 79 | Adenocarcinoma           | IV   | 24.2 | 15.8 | Gefitinib |   |
| 59 | M | 75 | Adenocarcinoma           | IV   | 14.2 | 8.8  | Gefitinib | Y |
| 60 | M | 67 | Squamous cellcarcinoma   | IV   | 9.2  | 4.2  | Icotinib  |   |
| 61 | F | 74 | Adenocarcinoma           | IV   | 8.8  | 6.8  | Erlotinib |   |
| 62 | F | 71 | Adenocarcinoma           | IV   | 5.2  | 4.6  | Erlotinib |   |
| 63 | M | 76 | Adenocarcinoma           | IB   | 47.7 | 13   | Gefitinib | Y |
| 64 | F | 77 | Adenocarcinoma           | IV   | 11   | 5.4  | Erlotinib |   |
| 65 | M | 67 | Adenocarcinoma           | IIIB | 7.7  | 3.1  | Icotinib  |   |
| 66 | M | 68 | Adenocarcinoma           | IV   | 4.8  | 5    | Icotinib  |   |
| 67 | M | 66 | Adenocarcinoma           | IV   | 12.2 | 6.3  | Gefitinib |   |
| 68 | F | 81 | Adenocarcinoma           | IV   | 17.8 | 6.7  | Gefitinib | Y |

|    |   |    |                             |        |           |      |           |   |
|----|---|----|-----------------------------|--------|-----------|------|-----------|---|
| 69 | F | 71 | Adenocarcinoma              | IV     | 31        | 17.9 | Gefitinib |   |
| 70 | F | 80 | Squamous<br>cellcarcinoma   | IV     | 26.8      | 19   | Erlotinib |   |
| 71 | F | 76 | Adenocarcinoma              | IV     | 84        | 48   | Gefitinib |   |
| 72 | F | 67 | Adenocarcinoma              | IV     | 43        | 4.1  | Gefitinib |   |
| 73 | M | 66 | Adenocarcinoma              | IV     | 27.2      | 9.5  | Gefitinib | Y |
| 74 | F | 68 | Adenocarcinoma              | I<br>V | 71.7      | 16.7 | Gefitinib | Y |
| 75 | M | 70 | Adenocarcinoma              | IV     | 11.8      | 7.6  | Gefitinib |   |
| 76 | F | 68 | Adenocarcinoma              | IV     | 32        | 15.3 | Gefitinib |   |
| 77 | M | 73 | Squamous<br>cellcarcinoma   | IV     | 6.6.<br>3 | 4.3  | Erlotinib |   |
| 78 | M | 68 | Adenocarcinoma              | IV     | 13.7      | 10.3 | Erlotinib |   |
| 79 | F | 72 | Adenocarcinoma              | IV     | 11.8      | 8.2  | Gefitinib |   |
| 80 | M | 89 | Adenocarcinoma              | IIIB   | 60        | 15.2 | Gefitinib |   |
| 81 | M | 71 | Adenocarcinoma              | IV     | 10.2      | 1.8  | Icotinib  |   |
| 82 | F | 80 | Squamous<br>cellcarcinoma   | IV     | 5.4       | 3.3  | Erlotinib |   |
| 83 | M | 82 | Adenocarcinoma              | IV     | 9.3       | 8.8  | Gefitinib |   |
| 84 | F | 70 | Adenocarcinoma              | IV     | 23.8      | 21.8 | Gefitinib |   |
| 85 | F | 69 | Adenocarcinoma              | IV     | 12.3      | 3.9  | Erlotinib |   |
| 86 | F | 67 | Non-small cell<br>carcinoma | IV     | 20.2      | 2.2  | Gefitinib |   |
| 87 | F | 70 | Adenocarcinoma              | IIIA   | 38.2      | 18.2 | Gefitinib |   |
| 88 | M | 66 | Adenocarcinoma              | IIIA   | 95.4      | 23.2 | Gefitinib |   |
| 89 | M | 66 | Adenocarcinoma              | IIIB   | 47.2      | 17.3 | Erlotinib | Y |
| 90 | F | 68 | Adenocarcinoma              | IB     | 60.2      | 18.9 | Gefitinib |   |
| 91 | F | 66 | Adenocarcinoma              | IIIA   | 29.8      | 6.2  | Gefitinib |   |
| 92 | F | 69 | Adenocarcinoma              | IV     | 71.8      | 9.9  | Gefitinib |   |

|     |   |    |                |      |      |      |           |   |
|-----|---|----|----------------|------|------|------|-----------|---|
| 93  | F | 66 | Adenocarcinoma | IV   | 48   | 12.2 | Gefitinib |   |
| 94  | F | 68 | Adenocarcinoma | IIIA | 28   | 5.1  | Gefitinib |   |
| 95  | M | 63 | Adenocarcinoma | IIA  | 72.2 | 48   | Erlotinib | Y |
| 96  | M | 75 | Adenocarcinoma | IV   | 33.5 | 11.5 | Erlotinib |   |
| 97  | M | 70 | Adenocarcinoma | IIA  | 34.5 | 9.7  | Erlotinib |   |
| 98  | M | 66 | Adenocarcinoma | IIIA | 96   | 11.2 | Gefitinib |   |
| 99  | F | 66 | Adenocarcinoma | IIIB | 74.4 | 23.4 | Gefitinib |   |
| 100 | F | 68 | Adenocarcinoma | IIIB | 33.5 | 25.9 | Erlotinib |   |
| 101 | F | 80 | Adenocarcinoma | IIA  | 60.6 | 9.2  | Erlotinib | Y |
| 102 | M | 70 | Adenocarcinoma | IIA  | 35.5 | 7.8  | Erlotinib |   |
| 103 | M | 66 | Adenocarcinoma | IIIB | 12   | 7.8  | Erlotinib |   |
| 104 | F | 66 | Adenocarcinoma | IV   | 7.2  | 6.2  | Gefitinib |   |
| 105 | M | 70 | Adenocarcinoma | IV   | 7.8  | 7.5  | Gefitinib |   |
| 106 | M | 61 | Adenocarcinoma | IV   | 17   | 13.1 | Erlotinib |   |
| 107 | F | 55 | Adenocarcinoma | IIIB | 10.1 | 8.8  | Erlotinib |   |
| 108 | M | 53 | Adenocarcinoma | IIIA | 12.9 | 12   | Erlotinib |   |
| 109 | M | 68 | Adenocarcinoma | IIIA | 13.6 | 8.8  | Erlotinib |   |
| 110 | M | 45 | Adenocarcinoma | IV   | 8.5  | 6.5  | Erlotinib |   |
| 111 | M | 70 | Adenocarcinoma | IV   | 13.4 | 7.5  | Gefitinib |   |
| 112 | M | 72 | Adenocarcinoma | IIIA | 9.5  | 8.2  | Gefitinib |   |

---

Supplementary table 2 Non-EGFR-TKI patients' characteristics

| NUMBER | GENER | AGE (Y) | HISTOLOGY                | STAGE | OS (M) | PFS <sub>1</sub> (M) | Chemotherapy (PFS <sub>1</sub> ) | ACEI /ARB |
|--------|-------|---------|--------------------------|-------|--------|----------------------|----------------------------------|-----------|
| 1      | F     | 66      | Adenocarcinoma           | IV    | 7.5    | 3.5                  | AC                               | Y         |
| 2      | M     | 65      | Non small cell carcinoma | IV    | 21.8   | 6.2                  | GP                               |           |
| 3      | M     | 50      | Squamous cellcarcinoma   | IV    | 20.2   | 4.2                  | GP                               |           |
| 4      | M     | 60      | Adenocarcinoma           | IV    | 10.3   | 3.6                  | GP                               |           |
| 5      | M     | 62      | Aenocarcinomad           | IIIB  | 18     | 4.8                  | GP                               |           |
| 6      | M     | 62      | Adenocarcinoma           | IIIA  | 6.8    | 1.3                  | GP                               |           |
| 7      | M     | 47      | Adenocarcinoma           | IV    | 5.5    | 4.1                  | AC                               |           |
| 8      | M     | 73      | Squamous cellcarcinoma   | IIIA  | 4.8    | 3.7                  | GC                               |           |
| 9      | M     | 66      | Squamous cellcarcinoma   | IV    | 7.8    | 4.9                  | TC                               | Y         |
| 10     | M     | 53      | Squamous cellcarcinoma   | IV    | 2.8    | 1.7                  | GP                               |           |
| 11     | M     | 76      | Adenocarcinoma           | IV    | 8.8    | 4.2                  | GP                               |           |
| 12     | M     | 68      | Squamous cellcarcinoma   | IV    | 4.7    | 2.2                  | GP                               |           |
| 13     | M     | 66      | Adenocarcinoma           | IIIB  | 19.2   | 2.2                  | TP                               | Y         |
| 14     | M     | 59      | Adenocarcinoma           | IV    | 9.1    | 5.1                  | GC                               |           |
| 15     | M     | 57      | Adenocarcinoma           | IV    | 6.2    | 4.8                  | AP                               |           |
| 16     | M     | 82      | Big cell carcinoma       | IV    | 71.8   | 9.5                  | GC                               |           |
| 17     | M     | 51      | Adenocarcinoma           | IV    | 6.8    | 5.1                  | GP                               |           |
| 18     | M     | 64      | Adenocarcinoma           | IIIA  | 6.1    | 4.8                  | AP                               |           |
| 19     | M     | 49      | Adenocarcinoma           | IIIB  | 5.1    | 2.8                  | AP                               |           |
| 20     | M     | 77      | Squamous cellcarcinoma   | IIIB  | 7.7    | 4.1                  | GP                               | Y         |

|    |   |    |                             |      |      |      |    |   |
|----|---|----|-----------------------------|------|------|------|----|---|
| 21 | M | 67 | Squamous<br>cellcarcinoma   | IV   | 9.1  | 3.2  | GC |   |
| 22 | M | 65 | Adenocarcinoma              | IV   | 19.5 | 9.5  | GC |   |
| 23 | M | 66 | Squamous<br>cellcarcinoma   | IIB  | 140  | 120  | GP | Y |
| 24 | M | 51 | Squamous<br>cellcarcinoma   | IV   | 13.1 | 3.1  | GC |   |
| 25 | M | 60 | Squamous<br>cellcarcinoma   | IV   | 3.2  | 2.9  | GC |   |
| 26 | F | 65 | Adenocarcinoma              | IV   | 7.2  | 2.2  | GC |   |
| 27 | M | 75 | Adenocarcinoma              | IV   | 9.7  | 2.9  | GC |   |
| 28 | M | 72 | Adenocarcinoma              | IV   | 12.8 | 1.9  | GP |   |
| 29 | M | 53 | Adenocarcinoma              | IIIA | 12.7 | 4.8  | GC |   |
| 30 | M | 75 | Adenocarcinoma              | IV   | 11.5 | 4.2  | GC |   |
| 31 | M | 63 | Adenocarcinoma              | IV   | 15.8 | 6.1  | GP |   |
| 32 | M | 77 | Squamous<br>cellcarcinoma   | IIIA | 11.9 | 8.1  | GC |   |
| 33 | M | 60 | Adenocarcinoma              | IV   | 17.3 | 1.9  | AP |   |
| 34 | F | 70 | Adenocarcinoma              | IV   | 17.2 | 6.2  | GP |   |
| 35 | F | 68 | Adenocarcinoma              | IV   | 8.8  | 4.2  | GP |   |
| 36 | F | 65 | Adenocarcinoma              | IV   | 11.2 | 3.8  | AC |   |
| 37 | F | 68 | Non small cell<br>carcinoma | IV   | 8.8  | 5.7  | TC |   |
| 38 | M | 71 | Adenocarcinoma              | IV   | 15.2 | 4.8  | AP |   |
| 39 | M | 50 | Adenocarcinoma              | IV   | 11.8 | 5.2  | PC |   |
| 40 | M | 63 | Adenocarcinoma              | IIIB | 9.2  | 2.1  | GP |   |
| 41 | M | 61 | Squamous<br>cellcarcinoma   | IV   | 15.5 | 7.9  | GP |   |
| 42 | M | 66 | Non small cell<br>carcinoma | IV   | 14.8 | 11.3 | GP | Y |
| 43 | M | 73 | Squamous<br>cellcarcinoma   | IIIA | 5.8  | 3.2  | GP |   |



---

|    |   |    |                             |      |      |      |    |   |
|----|---|----|-----------------------------|------|------|------|----|---|
| 44 | F | 58 | Squamous<br>cellcarcinoma   | IV   | 14.5 | 5.1  | GP |   |
| 45 | M | 82 | Adenocarcinoma              | IV   | 18.5 | 17.5 | AC | Y |
| 46 | M | 75 | Adenocarcinoma              | IV   | 17.5 | 10.2 | AC | Y |
| 47 | M | 53 | Adenocarcinoma              | IV   | 36.2 | 2.8  | TC |   |
| 48 | M | 57 | Adenocarcinoma              | IV   | 23.6 | 2.1  | GC |   |
| 49 | M | 55 | Squamous<br>cellcarcinoma   | IV   | 23.9 | 3.2  | GP |   |
| 50 | M | 45 | Adenocarcinoma              | IV   | 4.8  | 1.2  | AP |   |
| 51 | M | 59 | Adenocarcinoma              | IV   | 28.5 | 9.2  | GP |   |
| 52 | M | 57 | Neuroendocrine<br>carcinoma | IV   | 60.1 | 4.9  | EC |   |
| 53 | F | 54 | Adenocarcinoma              | IV   | 4.2  | 2.7  | AP |   |
| 54 | M | 60 | Squamous<br>cellcarcinoma   | IIIA | 16.2 | 9.8  | GP |   |
| 55 | M | 61 | Squamous<br>cellcarcinoma   | IIIB | 3.9  | 1.8  | GP | Y |
| 56 | M | 76 | Adenocarcinoma              | IV   | 4.9  | 1.8  | GP |   |
| 57 | M | 61 | Squamous<br>cellcarcinoma   | IIB  | 15.8 | 5.1  | GP |   |
| 58 | M | 73 | Squamous<br>cellcarcinoma   | IV   | 3.1  | 2.1  | GP |   |
| 59 | M | 59 | Adenocarcinoma              | IV   | 12.2 | 3.8  | AP |   |
| 60 | M | 58 | Squamous<br>cellcarcinoma   | IV   | 5.1  | 4.1  | GP |   |
| 61 | M | 61 | Squamous<br>cellcarcinoma   | IV   | 2.1  | 1.3  | GP | Y |
| 62 | M | 68 | Adenocarcinoma              | IV   | 15.8 | 5.2  | AP |   |
| 63 | M | 60 | Adenocarcinoma              | IV   | 40.9 | 8.1  | GP |   |
| 64 | M | 57 | Non small cell<br>carcinoma | IV   | 51.8 | 4.7  | EC |   |
| 65 | M | 67 | Adenocarcinoma              | IV   | 15.3 | 4.1  | GP |   |
| 66 | F | 75 | Adenocarcinoma              | IV   | 14.7 | 2.8  | GP |   |

---

|    |   |    |                             |      |      |      |    |   |
|----|---|----|-----------------------------|------|------|------|----|---|
| 67 | M | 70 | Squamous<br>cellcarcinoma   | IV   | 3.3  | 2.1  | GP |   |
| 68 | M | 46 | Squamous<br>cellcarcinoma   | IV   | 2.5  | 1.8  | GC |   |
| 69 | F | 64 | Adenocarcinoma              | IV   | 9.2  | 3.3  | GP |   |
| 70 | F | 63 | Adenocarcinoma              | IV   | 20.6 | 5.2  | GP | Y |
| 71 | M | 41 | Squamous<br>cellcarcinoma   | IV   | 6.4  | 3.1  | GP |   |
| 72 | M | 56 | Adenocarcinoma              | IV   | 8.8  | 3.3  | GC |   |
| 73 | M | 64 | Adenocarcinoma              | IIIA | 4.2  | 2.7  | AC |   |
| 74 | M | 76 | Squamous<br>cellcarcinoma   | IIIB | 7.2  | 3.6  | GP | Y |
| 75 | M | 76 | Neuroendocrine<br>carcinoma | IIB  | 8.2  | 4.9  | GC |   |
| 76 | M | 69 | Squamous<br>cellcarcinoma   | IV   | 7.8  | 1.2  | GP |   |
| 77 | M | 55 | Squamous<br>cellcarcinoma   | IV   | 20.1 | 2.7  | GP |   |
| 78 | M | 74 | Adenocarcinoma              | IV   | 12.5 | 8.8  | GC |   |
| 79 | M | 55 | Adenocarcinoma              | IV   | 12.2 | 11.3 | GP | Y |
| 80 | M | 75 | Adenocarcinoma              | IV   | 2.5  | 2.2  | GP |   |
| 81 | M | 63 | Adenocarcinoma              | IV   | 13.5 | 10.2 | AC |   |
| 82 | M | 54 | Adenocarcinoma              | IV   | 7.6  | 3.8  | GP |   |
| 83 | M | 60 | Adenocarcinoma              | IV   | 36   | 4.2  | GP |   |
| 84 | M | 67 | Adenocarcinoma              | IV   | 14.4 | 4.3  | GP |   |
| 85 | M | 44 | Adenocarcinoma              | IV   | 23.9 | 3.4  | GP |   |
| 86 | F | 67 | Squamous<br>cellcarcinoma   | IV   | 16.6 | 2.3  | TP |   |
| 87 | M | 76 | Adenocarcinoma              | IV   | 5.8  | 4.2  | GP |   |
| 88 | M | 63 | Squamous<br>cellcarcinoma   | IIIB | 8.2  | 2.2  | GP |   |
| 89 | M | 63 | Adenocarcinoma              | IV   | 24   | 4.8  | AP |   |

|     |   |    |                           |      |          |      |    |   |
|-----|---|----|---------------------------|------|----------|------|----|---|
| 90  | F | 72 | Adenocarcinoma            | IV   | 13.6     | 1.5  | GC |   |
| 91  | M | 62 | Adenocarcinoma            | IV   | 8.2      | 2.1  | GP |   |
| 92  | M | 51 | Adenocarcinoma            | IV   | 12.2     | 6.5  | AC | Y |
| 93  | M | 74 | Adenocarcinoma            | IV   | 12.4     | 10.8 | AC |   |
| 94  | F | 52 | Adenocarcinoma            | IV   | 7.8      | 5.5  | GP | Y |
| 95  | F | 65 | Adenocarcinoma            | IV   | 35.8     | 2.2  | GP |   |
| 96  | F | 75 | Adenocarcinoma            | IV   | 24       | 8.2  | NP | Y |
| 97  | M | 57 | Adenocarcinoma            | IV   | 4.2      | 3.3  | AP | Y |
| 98  | F | 76 | Adenocarcinoma            | IV   | 4.2      | 3.8  | AP |   |
| 99  | M | 62 | Squamous<br>cellcarcinoma | IV   | 4.3      | 3.7  | GC |   |
| 100 | F | 53 | Adenocarcinoma            | IV   | 5.5      | 4.2  | TC |   |
| 101 | M | 59 | Adenocarcinoma            | IV   | 28.<br>2 | 4.3  | GP |   |
| 102 | M | 74 | Adenocarcinoma            | IV   | 14.3     | 7.9  | GC | Y |
| 103 | F | 75 | Adenocarcinoma            | IV   | 8.8      | 4.9  | GP |   |
| 104 | F | 54 | Squamous<br>cellcarcinoma | IV   | 3.2      | 2.7  | GP |   |
| 105 | F | 79 | Adenocarcinoma            | IV   | 13.7     | 1.7  | GP | Y |
| 106 | F | 47 | Adenocarcinoma            | IV   | 15.8     | 3.2  | GP |   |
| 107 | F | 58 | Adenocarcinoma            | IV   | 8.9      | 4.7  | AP |   |
| 108 | M | 76 | Squamous<br>cellcarcinoma | IIIB | 6.9      | 3.7  | GP |   |
| 109 | M | 62 | Adenocarcinoma            | IV   | 4.8      | 3.8  | AC |   |
| 110 | F | 53 | Adenocarcinoma            | IV   | 11.6     | 3.8  | AC |   |
| 111 | F | 55 | Adenocarcinoma            | IV   | 3.3      | 2.2  | GP |   |
| 112 | F | 61 | Adenocarcinoma            | IV   | 6        | 5.2  | AP | Y |
| 113 | M | 72 | Adenocarcinoma            | IV   | 3.2      | 2.8  | AP |   |

|     |   |    |                           |      |      |     |    |   |
|-----|---|----|---------------------------|------|------|-----|----|---|
| 114 | F | 52 | Adenocarcinoma            | IV   | 6.1  | 1.6 | GC |   |
| 115 | F | 68 | Adenocarcinoma            | IV   | 14.4 | 3.5 | GP |   |
| 116 | F | 48 | Adenocarcinoma            | IV   | 6.9  | 3.3 | GP |   |
| 117 | F | 51 | Adenocarcinoma            | IV   | 5.9  | 3.2 | AC |   |
| 118 | F | 79 | Squamous<br>cellcarcinoma | IV   | 11.2 | 8.1 | NP | Y |
| 119 | F | 45 | Adenocarcinoma            | IV   | 4.5  | 1.4 | AC |   |
| 120 | F | 57 | Adenocarcinoma            | IV   | 9.2  | 4.5 | NP |   |
| 121 | M | 61 | Squamous<br>cellcarcinoma | IV   | 5.2  | 2.7 | GP |   |
| 122 | M | 63 | Adenocarcinoma            | IV   | 24.5 | 5.5 | AP |   |
| 123 | M | 57 | Adenocarcinoma            | IV   | 8.9  | 4.5 | GP |   |
| 124 | M | 57 | Adenocarcinoma            | IV   | 5.8  | 3.1 | GP |   |
| 125 | F | 53 | Adenocarcinoma            | IV   | 4.2  | 1.8 | TP |   |
| 126 | M | 46 | Adenocarcinoma            | IV   | 3.1  | 1.8 | AC |   |
| 127 | M | 59 | Adenocarcinoma            | IV   | 6.2  | 3.1 | GP |   |
| 128 | M | 44 | Adenocarcinoma            | IV   | 6.8  | 4.2 | AC |   |
| 129 | M | 72 | Adenocarcinoma            | IV   | 4.8  | 2.9 | TP |   |
| 130 | M | 66 | Adenocarcinoma            | IV   | 7.8  | 3.3 | NP |   |
| 131 | M | 71 | Adenocarcinoma            | IV   | 6.2  | 2.9 | NP |   |
| 132 | M | 72 | Adenocarcinoma            | IV   | 4.9  | 2.8 | NP |   |
| 133 | F | 62 | Adenocarcinoma            | IV   | 4.3  | 3.2 | NP | Y |
| 134 | M | 68 | Squamous<br>cellcarcinoma | IIA  | 59.8 | 40  | GP | Y |
| 135 | M | 60 | Squamous<br>cellcarcinoma | IIIA | 48.1 | 9.9 | GP |   |
| 136 | M | 71 | Adenocarcinoma            | IIB  | 12.2 | 6.5 | GP |   |
| 137 | M | 63 | Squamous<br>cellcarcinoma | IIIB | 10.8 | 3.8 | GP | Y |

|     |   |    |                              |      |      |      |    |   |
|-----|---|----|------------------------------|------|------|------|----|---|
| 138 | M | 61 | Squamous<br>cellcarcinoma    | IIIA | 25.5 | 7.5  | TC |   |
| 139 | M | 60 | Adenocarcinoma               | IB   | 60   | 30.7 | AC |   |
| 140 | M | 59 | Squamous<br>cellcarcinoma    | IIA  | 17.6 | 7.9  | GP |   |
| 141 | M | 54 | Adenosquamous<br>carcinoma   | IV   | 15.2 | 9.2  | GP | Y |
| 142 | M | 59 | Squamous<br>cellcarcinoma    | IIIB | 17.8 | 4.4  | GP | Y |
| 143 | M | 49 | Adenocarcinoma               | IIA  | 17.2 | 6.8  | GP |   |
| 144 | F | 66 | Squamous<br>cellcarcinoma    | IB   | 28.2 | 8.3  | GP |   |
| 145 | F | 71 | Squamous<br>cellcarcinoma    | IIIB | 18.5 | 10.8 | GP |   |
| 146 | M | 57 | Squamous<br>cellcarcinoma    | IIIA | 4.2  | 1.8  | TP |   |
| 147 | M | 63 | Adenocarcinoma               | IIIA | 15.3 | 9.2  | GP |   |
| 148 | M | 61 | Squamous<br>cellcarcinoma    | IB   | 120  | 120  | GP | Y |
| 149 | F | 56 | Adenocarcinoma               | IB   | 72   | 35.6 | AC | Y |
| 150 | F | 70 | Adenocarcinoma               | IB   | 50.7 | 44.7 | GP | Y |
| 151 | F | 70 | Adenocarcinoma               | IB   | 45.3 | 14.5 | AP | Y |
| 152 | F | 57 | Adenocarcinoma               | IB   | 25.1 | 8.8  | AC |   |
| 153 | F | 64 | Adenocarcinoma               | IIB  | 28.7 | 6.8  | NP |   |
| 154 | F | 65 | Adenocarcinoma               | IIIA | 12.2 | 3.8  | GP |   |
| 155 | M | 65 | Adenocarcinoma               | IV   | 11.5 | 10.4 | NP | Y |
| 156 | M | 51 | Adenocarcinoma               | IA   | 55.3 | 8.2  | AP |   |
| 157 | F | 57 | Adenocarcinoma               | IIIB | 39.5 | 8.3  | TP |   |
| 158 | M | 68 | Squamous<br>cellcarcinoma    | IIA  | 22.5 | 4.5  | GP |   |
| 159 | M | 54 | Adenocarcinoma               | IV   | 29.7 | 7.7  | NP |   |
| 160 | M | 56 | Large cell lung<br>carcinoma | IIIA | 20.5 | 5.5  | GC |   |

---

|     |   |    |                              |      |      |      |    |   |
|-----|---|----|------------------------------|------|------|------|----|---|
| 161 | F | 78 | Adenocarcinoma               | IV   | 33   | 31   | AC | Y |
| 162 | F | 68 | Squamous<br>cellcarcinoma    | IV   | 30.5 | 4.5  | GP |   |
| 163 | F | 56 | Adenocarcinoma               | IV   | 71.9 | 5.5  | GC |   |
| 164 | M | 61 | Squamous<br>cellcarcinoma    | IV   | 9.2  | 7.2  | GP |   |
| 165 | M | 67 | Adenocarcinoma               | IB   | 48.2 | 12.6 | AP | Y |
| 166 | M | 68 | Adenocarcinoma               | IIIA | 83.8 | 70   | GP |   |
| 167 | M | 67 | Squamous<br>cellcarcinoma    | IIIB | 13.2 | 10.8 | GP |   |
| 168 | M | 77 | Squamous<br>cellcarcinoma    | IIIB | 14.8 | 12.3 | GC |   |
| 169 | M | 42 | Adenocarcinoma               | IIB  | 18.5 | 11.2 | GP |   |
| 170 | M | 46 | Adenocarcinoma               | IB   | 23.8 | 12.2 | AP |   |
| 171 | F | 59 | Adenocarcinoma               | IIB  | 15.3 | 12.5 | AP |   |
| 172 | M | 69 | Squamous<br>cellcarcinoma    | IV   | 84.3 | 11.8 | GC |   |
| 173 | M | 43 | Adenocarcinoma               | IIA  | 35.5 | 11.7 | AP |   |
| 174 | M | 49 | Large cell lung<br>carcinoma | IIIB | 17.2 | 13.3 | AC |   |
| 175 | F | 66 | Adenocarcinoma               | IV   | 8.8  | 2.2  | AP |   |
| 176 | F | 77 | Adenocarcinoma               | IIIA | 14.4 | 12.8 | GP |   |
| 177 | F | 71 | Adenocarcinoma               | IB   | 29.7 | 11.2 | GP |   |
| 178 | F | 61 | Adenocarcinoma               | IIIB | 14.6 | 12.1 | GP |   |
| 179 | M | 66 | Adenocarcinoma               | IIB  | 18.2 | 12.1 | GP |   |
| 180 | M | 69 | Squamous<br>cellcarcinoma    | IIIA | 18.1 | 11.8 | GP |   |
| 181 | M | 69 | Squamous<br>cellcarcinoma    | IIB  | 24.2 | 11.2 | GP |   |
| 182 | M | 58 | Adenocarcinoma               | IB   | 36.5 | 13.5 | GP |   |
| 183 | M | 59 | Squamous<br>cellcarcinoma    | IIIA | 16.9 | 13.5 | GP |   |

---

|     |   |    |                           |     |      |      |    |   |
|-----|---|----|---------------------------|-----|------|------|----|---|
| 184 | M | 67 | Adenocarcinoma            | IIA | 29.3 | 3.8  | NP |   |
| 185 | F | 68 | Adenocarcinoma            | IIA | 36   | 8    | GP |   |
| 186 | M | 56 | Adenocarcinoma            | IB  | 15.5 | 9    | GP | Y |
| 187 | M | 58 | Adenocarcinoma            | IB  | 45.9 | 3.1  | TP |   |
| 188 | F | 65 | Squamous<br>cellcarcinoma | IB  | 72.4 | 4.1  | GC |   |
| 189 | M | 77 | Squamous<br>cellcarcinoma | IB  | 71.7 | 36.3 | AC |   |

Supplementary table 3 Subgroup patients' characteristics

| Characteristics      | ACEI/ARB | Non-ACEI/ARB | p value | HBP | Non-HBP | p value |
|----------------------|----------|--------------|---------|-----|---------|---------|
| Advanced NSCLC       |          |              |         |     |         |         |
| Subgroup             |          |              |         |     |         |         |
| Age, years           |          |              |         |     |         |         |
| ≤65                  | 11       | 85           | 0.07    | 32  | 70      | 0.19    |
| >65                  | 27       | 105          |         | 50  | 76      |         |
| Sex                  |          |              |         |     |         |         |
| Male                 | 20       | 90           | 0.55    | 55  | 96      | 0.84    |
| Female               | 18       | 100          |         | 27  | 50      |         |
| PS                   |          |              |         |     |         |         |
| 0                    | 19       | 89           | 0.72    | 30  | 60      | 0.50    |
| ≥1                   | 19       | 101          |         | 52  | 86      |         |
| Grade                |          |              |         |     |         |         |
| Good/moderate        | 22       | 102          | 0.63    | 39  | 80      | 0.93    |
| Poor                 | 16       | 88           |         | 43  | 86      |         |
| Chemotherapy         |          |              |         |     |         |         |
| Only first-line      | 8        | 70           | 0.06    | 40  | 54      | 0.08    |
| Second-line or more  | 30       | 120          |         | 42  | 92      |         |
| Undergoing surgeries |          |              |         |     |         |         |
| Characteristics      | ACEI/ARB | Non-ACEI/ARB | p value | HBP | Non-HBP | p value |
| Age, years           |          |              |         |     |         |         |
| ≤65                  | 7        | 39           | 0.26    | 9   | 12      | 0.15    |
| >65                  | 7        | 20           |         | 14  | 40      |         |
| Sex                  |          |              |         |     |         |         |
| Male                 | 10       | 40           | 0.79    | 13  | 30      | 0.92    |
| Female               | 4        | 19           |         | 10  | 22      |         |
| PS                   |          |              |         |     |         |         |
| 0                    | 9        | 30           | 0.37    | 16  | 32      | 0.50    |

|                     |          |    |              |    |    |         |
|---------------------|----------|----|--------------|----|----|---------|
| ≥1                  | 5        | 29 |              | 7  | 20 |         |
| Grade               |          |    |              |    |    |         |
| Good/moderate       | 11       | 42 | 0.58         | 10 | 24 | 0.83    |
| Poor                | 3        | 17 |              | 13 | 28 |         |
| Chemotherapy        |          |    |              |    |    |         |
| Only first-line     | 6        | 27 | 0.84         | 8  | 14 | 0.49    |
| Second-line or more | 8        | 32 |              | 15 | 38 |         |
| Subgroup            |          |    |              |    |    |         |
| Characteristics     | ACEI/ARB |    | EGFR-TKI     |    |    | p value |
|                     |          |    | Non-ACEI/ARB |    |    |         |
| Age, years          |          |    |              |    |    |         |
| ≤65                 |          | 10 |              | 48 |    | 0.72    |
| >65                 |          | 8  |              | 46 |    |         |
| Sex                 |          |    |              |    |    |         |
| Male                |          | 11 |              | 50 |    | 0.53    |
| Female              |          | 7  |              | 44 |    |         |
| PS                  |          |    |              |    |    |         |
| 0                   |          | 12 |              | 70 |    | 0.49    |
| ≥1                  |          | 6  |              | 24 |    |         |
| Grade               |          |    |              |    |    |         |
| Good/moderate       |          | 14 |              | 72 |    | 0.91    |
| Poor                |          | 4  |              | 22 |    |         |
| Chemotherapy        |          |    |              |    |    |         |
| Only first-line     |          | 8  |              | 22 |    | 0.07    |
| Second-line or more |          | 10 |              | 72 |    |         |
